# Supplementary material for: A long lifetime luminescent iridium(iii) complex chemosensor for the selective switch-on detection of Al3+ ions
Source: Royal Society of Chemistry journal article supplement (doi:10.1039/c5cc10383e), 2016-01-01
Supplement: c5cc10383e1.pdf [file c5cc10383e1.pdf]

***Supporting Information***

A long lifetime luminescent iridium(III) complex chemosensor  
for selective switch-on detection of Al<sup>3+</sup> ions

Wanhe Wang,<sup>‡a</sup> Zhifeng Mao,<sup>‡a</sup> Modi Wang,<sup>‡a</sup> Li-Juan Liu,<sup>b</sup> Daniel W. J. Kwong,<sup>a</sup>

Chung-Hang Leung<sup>\*b</sup> and Dik-Lung Ma<sup>\*a</sup>

<sup>a</sup> *Department of Chemistry, Hong Kong Baptist University, Kowloon Tong, Hong Kong, China. E-mail: [edmondma@hkbu.edu.hk](mailto:edmondma@hkbu.edu.hk).*

<sup>b</sup> *State Key Laboratory of Quality Research in Chinese Medicine, Institute of Chinese Medical Sciences, University of Macau, Macao, China. E-mail: [duncanleung@umac.mo](mailto:duncanleung@umac.mo).*

<sup>‡</sup> These authors contributed equally to this work.

**Materials.** Reagents, unless specified, were purchased from Sigma Aldrich (St. Louis, MO) and used as received. Iridium chloride hydrate ( $\text{IrCl}_3 \cdot x\text{H}_2\text{O}$ ) was purchased from Precious Metals Online (Australia). The fetal bovine serum 10270 (GIBCO®, origin: South America, EU approved origin) we used in time-resolved emission spectra measurement was purchased from life technologies.

**General experimental.** Mass spectrometry was performed at the Mass Spectroscopy Unit at the Department of Chemistry, Hong Kong Baptist University, Hong Kong (China). Deuterated solvents for NMR purposes were obtained from Armar and used as received.

$^1\text{H}$  and  $^{13}\text{C}$  NMR were recorded on a Bruker Avance 400 spectrometer operating at 400 MHz ( $^1\text{H}$ ) and 100 MHz ( $^{13}\text{C}$ ).  $^1\text{H}$  and  $^{13}\text{C}$  chemical shifts were referenced internally to solvent shift ( $\text{CD}_3\text{CN}$ :  $^1\text{H}$ ,  $\delta$  1.94,  $^{13}\text{C}$   $\delta$  118.7;  $\text{d}_6$ -DMSO:  $^1\text{H}$   $\delta$  2.50,  $^{13}\text{C}$   $\delta$  39.5). Chemical shifts ( $\delta$ ) are quoted in ppm, the downfield direction being defined as positive. Uncertainties in chemical shifts are typically  $\pm 0.01$  ppm for  $^1\text{H}$  and  $\pm 0.05$  for  $^{13}\text{C}$ . Coupling constants are typically  $\pm 0.1$  Hz for  $^1\text{H}$ - $^1\text{H}$  and  $\pm 0.5$  Hz for  $^1\text{H}$ - $^{13}\text{C}$  couplings. The following abbreviations are used for convenience in reporting the multiplicity of NMR resonances: s, singlet; d, doublet; t, triplet; q, quartet; m, multiplet; br, broad. All NMR data was acquired and processed using standard Bruker software (Topspin).

**Photophysical measurement.** Emission spectra and lifetime measurements for complexes were performed on a PTI TimeMaster C720 Spectrometer (Nitrogen laser: pulse output 337 nm). Error limits were estimated:  $\lambda$  ( $\pm 1$  nm);  $\tau$  ( $\pm 10\%$ );  $\phi$  ( $\pm 10\%$ ). All solvents used for the lifetime measurements were degassed using three cycles of freeze-vac-thaw.

**Live cell imaging assay.** HepG2 cells were seeded in at a density of  $1 \times 10^6$  cells per mL in coverglass-bottom confocal dishes. The cells were pre-incubated with **1** at the concentration of  $10 \mu\text{M}$  for 1 h at  $37^\circ\text{C}$ . Cells were then washed with PBS for three times and treated with vehicle control or  $\text{Al}^{3+}$  ( $100 \mu\text{M}$ ) for a further 30 min at  $37^\circ\text{C}$ . Cells were then washed with PBS for three times and incubated with fresh medium. The luminescence images of the cells were taken using Leica TCS SP8 confocal microscope using  $20\times$  objective lens.

**Synthesis of 1.** Compound **S1** was synthesized using a modified literature method.<sup>35</sup> 1,10-Phenanthroline-5,6-dione (0.315 g, 1.5 mmol), *p*-toluidine (0.16 g, 1.5 mmol), 4-hydroxy-3-nitrobenzaldehyde (0.25 g, 1.5 mmol) and ammonium acetate (1.16 g, 15 mmol) were added to acetic acid (10 mL) in a round bottomed flask. The reaction was

allowed to stir and refluxed at 125 °C overnight. The reaction mixture was poured into ice water (200 mL), neutralized with ammonium hydroxide. The resulting solution was extracted into dichloromethane (3 × 50 mL), dried (Na<sub>2</sub>SO<sub>4</sub>) and the volatiles removed in vacuo. Silica gel column chromatography was carried out to purify the residue (eluent, ethyl acetate: methanol, 10: 1, v/v) to afford the desired product **S1**. Yield: 54%. <sup>1</sup>H-NMR (400 MHz; DMSO-*d*<sub>6</sub>): 9.07 (dd, *J* = 4.0, 1.6 Hz, 1H), 8.99 (dd, *J* = 8.4, 2.0 Hz, 1H), 8.94 (dd, *J* = 4.4, 2.0 Hz, 1H), 8.03 (d, *J* = 2.4 Hz, 1H), 7.85 (dd, *J* = 8.0, 4.4 Hz, 1H), 7.75 (dd, *J* = 8.8, 2.0 Hz, 1H), 7.68 (d, *J* = 8.0 Hz, 2H), 7.56 (d, *J* = 8.0 Hz, 2H), 7.49 (dd, *J* = 8.4, 4.0 Hz, 1H), 7.40 (dd, *J* = 8.4, 4.0 Hz, 1H), 7.13 (d, *J* = 8.8 Hz, 1H), 2.52 (s, 3H). <sup>13</sup>C-NMR (400 MHz; DMSO-*d*<sub>6</sub>): δ 152.8, 149.8, 148.5, 147.5, 143.9, 143.6, 140.4, 136.4, 135.1, 134.9, 134.6, 131.2, 129.7, 128.5, 127.3, 126.6, 125.7, 123.8, 123.2, 122.5, 120.7, 119.3, 119.2, 21.0. HRMS: Calcd. for C<sub>26</sub>H<sub>17</sub>N<sub>5</sub>O<sub>3</sub>: *m/z* = 448.1410. Found: *m/z* = 448.1448. [M+H].

Compound **S2** was synthesized using a modified literature method.<sup>36</sup> Compound **S1** (0.224 g, 0.5 mmol) was dissolved in ethanol (30 mL) with stirring for 1 h. Pd/C (0.20 g, 10 % Pd) and NH<sub>2</sub>NH<sub>2</sub>·H<sub>2</sub>O (8 mL) were then added and the solution refluxed overnight. The hot solution was filtered and evaporated to remove the solvent under low pressure condition. Silica gel column chromatography was carried out to purify the residue (eluent, ethyl acetate: methanol, 10:2, v/v) to afford the desired product **S2**. Yield: 48%. <sup>1</sup>H-NMR (400 MHz; DMSO-*d*<sub>6</sub>): 9.44 (s, 1H), 9.05 (dd, *J* = 4.4, 2.0 Hz, 1H), 8.95 (dd, *J* = 8.4, 2.0 Hz, 1H), 8.90 (dd, *J* = 4.4, 1.6 Hz, 1H), 7.83 (dd, *J* = 8.4, 4.4 Hz, 1H), 7.54-7.43 (m, 5H), 7.33 (dd, *J* = 8.4, 1.6 Hz, 1H), 7.11 (d, *J* = 2.4 Hz, 1H), 6.49 (d, *J* = 8.4 Hz, 1H), 6.39 (dd, *J* = 8.4, 2.4 Hz, 1H), 4.67 (s, 2H), 2.48 (s, 3H). <sup>13</sup>C-NMR (400 MHz; DMSO-*d*<sub>6</sub>): δ 153.2, 148.2, 147.1, 145.2, 143.7, 143.5, 139.7, 136.6, 135.3, 134.9, 130.8, 129.6, 128.6, 127.1, 126.2, 123.6, 123.4, 122.3, 121.0, 119.5, 117.5, 115.6, 113.5. HRMS: Calcd. for C<sub>26</sub>H<sub>19</sub>N<sub>5</sub>O: *m/z* = 417.1590. Found: *m/z* = 417.1579.

Complex **S3** was synthesized using a modified literature method.<sup>37</sup> A solution of ligand **S2** (12.84 mg, 0.03078 mmol) and the dichloro-bridged [Ir(ppy)<sub>2</sub>Cl]<sub>2</sub> (15 mg, 0.014 mmol) in dichloromethane (3 mL) and methanol (3 mL) was stirred at 25 °C overnight. After the reaction completed, an excess of solid NH<sub>4</sub>PF<sub>6</sub> was added and stirred for another 0.5 h at 25 °C. The solvent was removed under reduced pressure and silica gel column chromatography was carried out to purify the residue (eluent, methanol: dichloromethane, 1:20, v/v) to yield **S3** as a brown powder. Yield: 65%. <sup>1</sup>H-NMR (400 MHz; DMSO-*d*<sub>6</sub>): 9.56 (s, 1H), 9.23 (dd, *J* = 8.4, 1.2 Hz, 1H), 8.28-8.20 (m, 3H), 8.11 (dd, *J* = 8.4, 4.8 Hz, 1H), 8.03 (dd, *J* = 5.2, 1.6 Hz, 1H), 7.96-7.84 (m, 4H), 7.74 (dd, *J* = 8.8, 5.2 Hz, 1H), 7.60-7.45 (m, 7H), 7.12 (d, *J* = 2.4 Hz, 1H),

7.12-6.90 (m, 6H), 6.51 (d,  $J = 8.4$  Hz, 1H), 6.42 (dd,  $J = 8.0, 2.4$  Hz, 1H), 6.25 (dd,  $J = 11.2, 7.2$  Hz, 1H), 4.73 (s, 2H), 2.48 (s, 3H).  $^{13}\text{C}$ -NMR (400 MHz; DMSO- $d_6$ ):  $\delta$  166.8, 155.2, 150.6, 150.2, 149.1, 149.0, 147.8, 145.8, 144.2, 144.1, 144.0, 140.5, 138.7, 136.8, 136.0, 134.5, 132.3, 131.2, 131.1, 130.3, 129.4, 128.5, 127.5, 127.4, 126.3, 125.9, 125.1, 123.9, 123.8, 122.3, 122.0, 120.2, 120.0, 117.7, 115.4, 113.6, 21.0. HRMS: Calcd. for  $\text{C}_{48}\text{H}_{35}\text{IrN}_7\text{O}$ :  $m/z = 918.2532$ . Found:  $m/z = 918.2532$ .

**Complex 1.** A solution of 2-hydroxyl-benzaldehyde (1.9 mg, 0.0155 mmol) in absolute ethanol was added to a solution containing complex **S3** (15 mg, 0.0141 mmol) in ethanol (5 mL). The mixture was refluxed under nitrogen for 5 h. The solution was then cooled to 25 °C, and the solvent was removed. The brown product was obtained through recrystallization from dichloromethane and diethyl ether to yield complex **1**. Yield: 68%.  $^1\text{H}$ -NMR (400 MHz;  $\text{CDCl}_3$ ):  $\delta$  12.2 (s, 1H), 9.32 (d,  $J = 8.4$  Hz, 1H), 8.40 (s, 1H), 8.23 (dd,  $J = 5.2, 1.2$  Hz, 1H), 8.15 (dd,  $J = 4.8, 1.2$  Hz, 1H), 7.90 (d,  $J = 8.0$  Hz, 2H), 7.81-7.67 (m, 7H), 7.58 (d,  $J = 7.2$  Hz, 1H), 7.52-7.47 (m, 2H), 7.42-7.31 (m, 7H), 7.10-7.02 (m, 3H), 7.00-6.91 (m, 5H), 6.86-6.83 (m, 1H), 6.41-6.38 (m, 2H), 2.55 (s, 3H).  $^{13}\text{C}$ -NMR (400 MHz;  $\text{CD}_3\text{CN}$ ): 167.1, 160.5, 150.2, 150.1, 149.8, 149.2, 149.0, 148.4, 148.2, 144.7, 144.4, 143.8, 138.1, 136.2, 134.3, 133.2, 132.0, 131.3, 130.9, 130.0, 129.8, 128.1, 127.6, 126.1, 125.7, 124.5, 123.1, 122.2, 119.4, 119.0, 118.9, 20.3. HRMS: Calcd. for  $\text{C}_{55}\text{H}_{39}\text{IrN}_7\text{O}_2[\text{M}-\text{PF}_6]^+$ : 1022.2794 Found: 1022.2756. Anal.: ( $\text{C}_{55}\text{H}_{41}\text{IrN}_7\text{O}_2\text{PF}_6$ ) +1.5 $\text{H}_2\text{O}$  C, H, N: calcd. 55.23, 3.71, 8.20; found 55.07, 3.33, 8.32.

**Al<sup>3+</sup> ions detection.** 10 mM of complex stock solution was prepared by dissolving complex **1** in acetonitrile. The complex was then added into acetonitrile to a final concentration of 20  $\mu\text{M}$ . Different concentrations of  $\text{Al}^{3+}$  ions were then added to 995  $\mu\text{L}$  of acetonitrile containing complex **1** (20  $\mu\text{M}$ ) and 5  $\mu\text{L}$   $\text{H}_2\text{O}$  in a cuvette. Emission spectra was recorded. Luminescence emission spectra were recorded on a PTI QM-4 spectrofluorometer (Photo Technology International, Birmingham, NJ) at 25 °C, with the slits for both excitation and emission set at 2.5 nm. UV-Vis absorption spectra were recorded on a Cary UV-300 spectrophotometer (double beam).

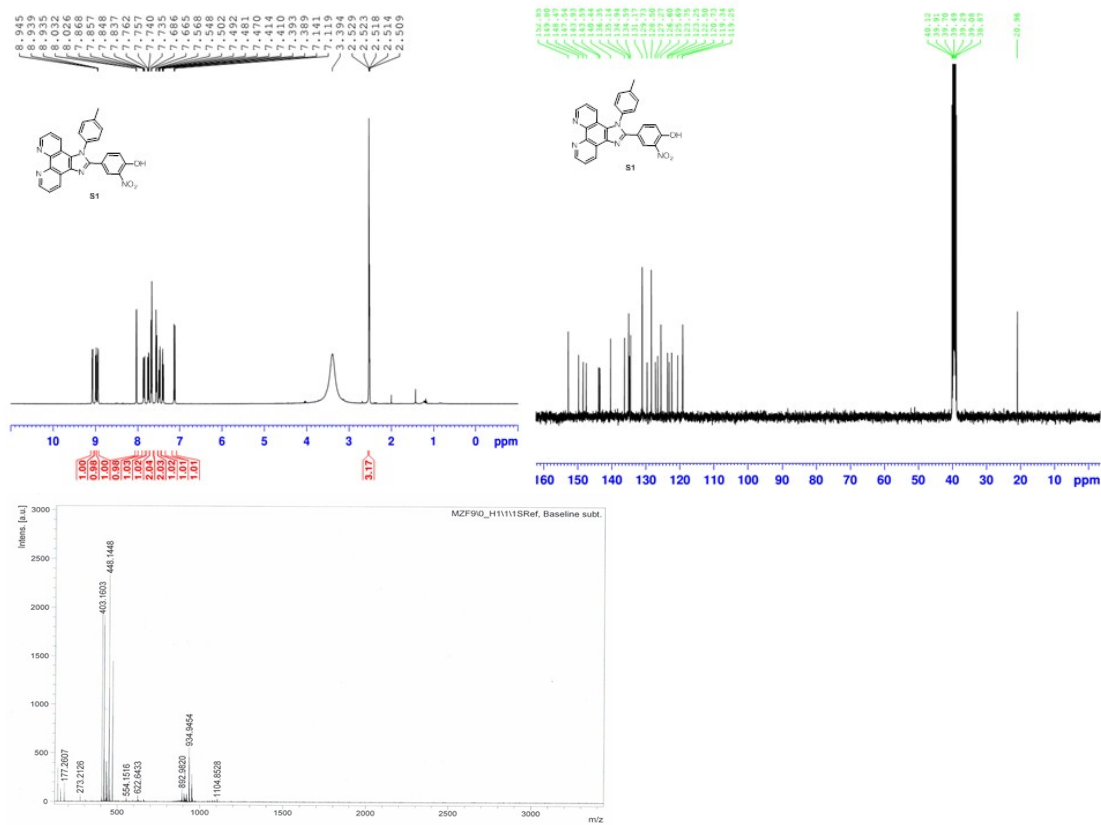

<sup>1</sup>H-NMR, <sup>13</sup>C-NMR and mass spectrum of S1.

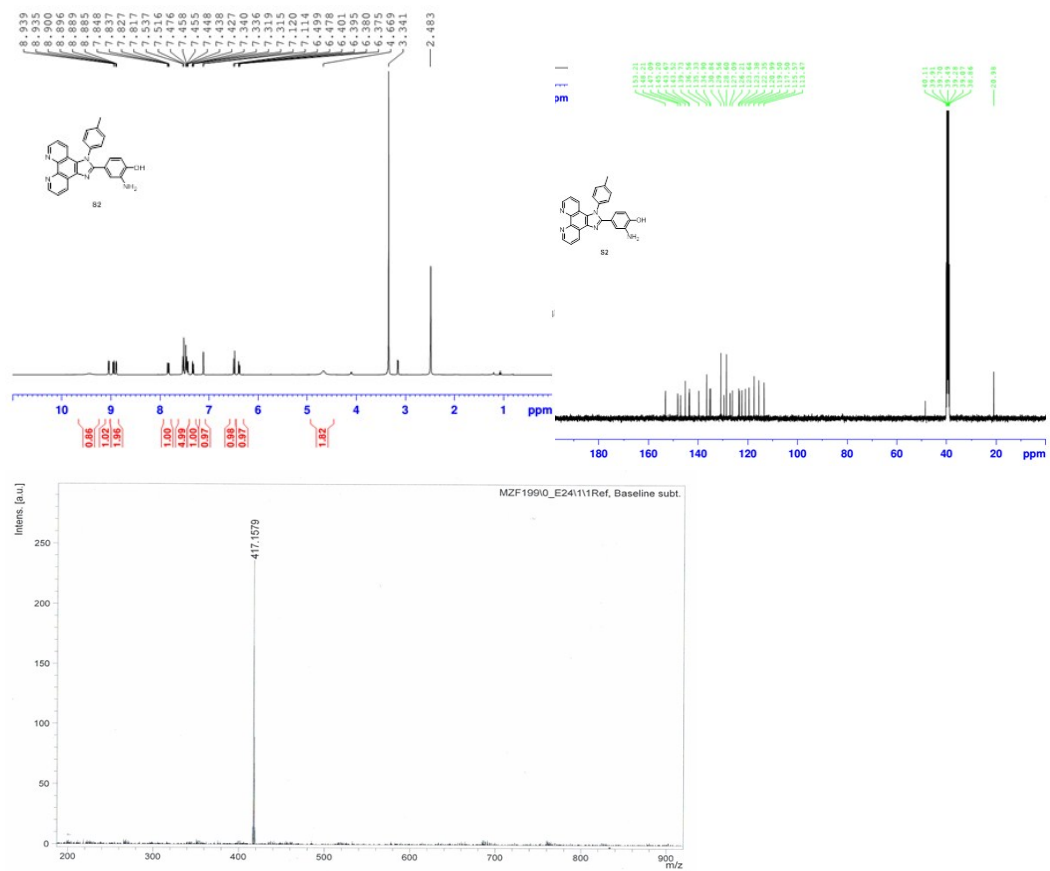

<sup>1</sup>H-NMR, <sup>13</sup>C-NMR and mass spectrum of S2.

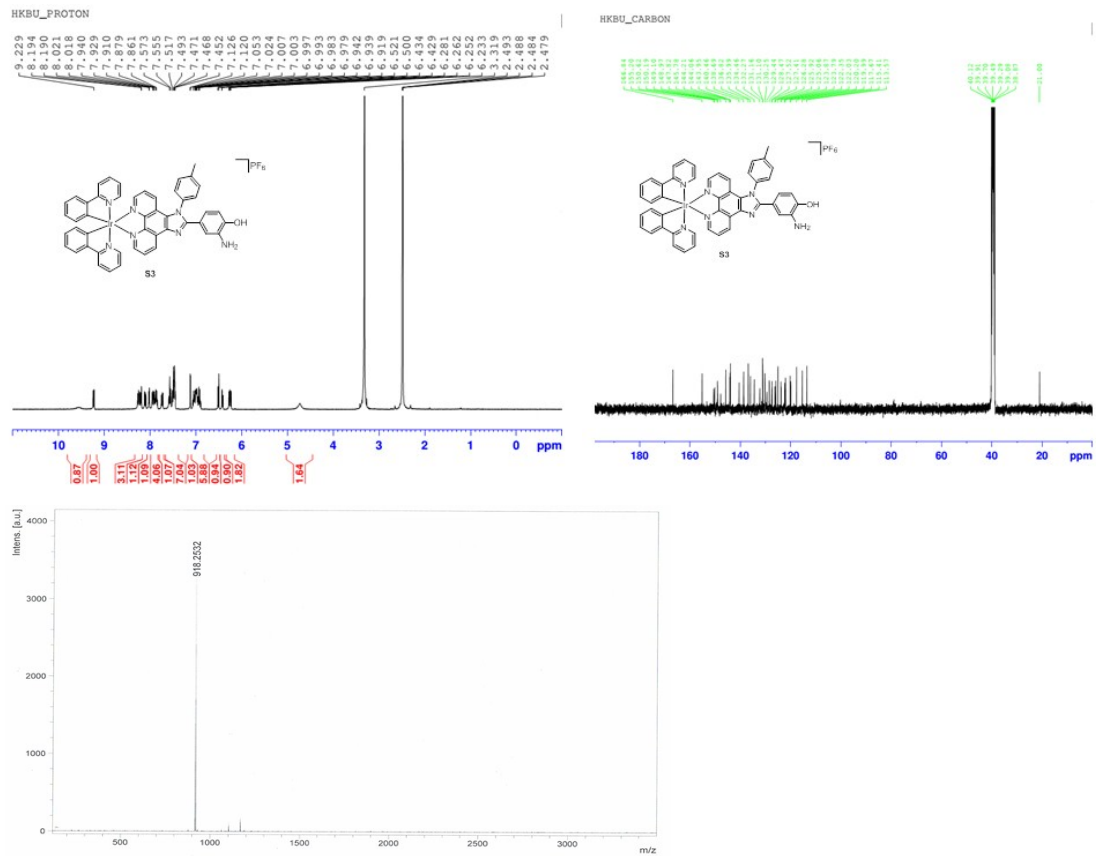

<sup>1</sup>H-NMR, <sup>13</sup>C-NMR and mass spectrum of S3.

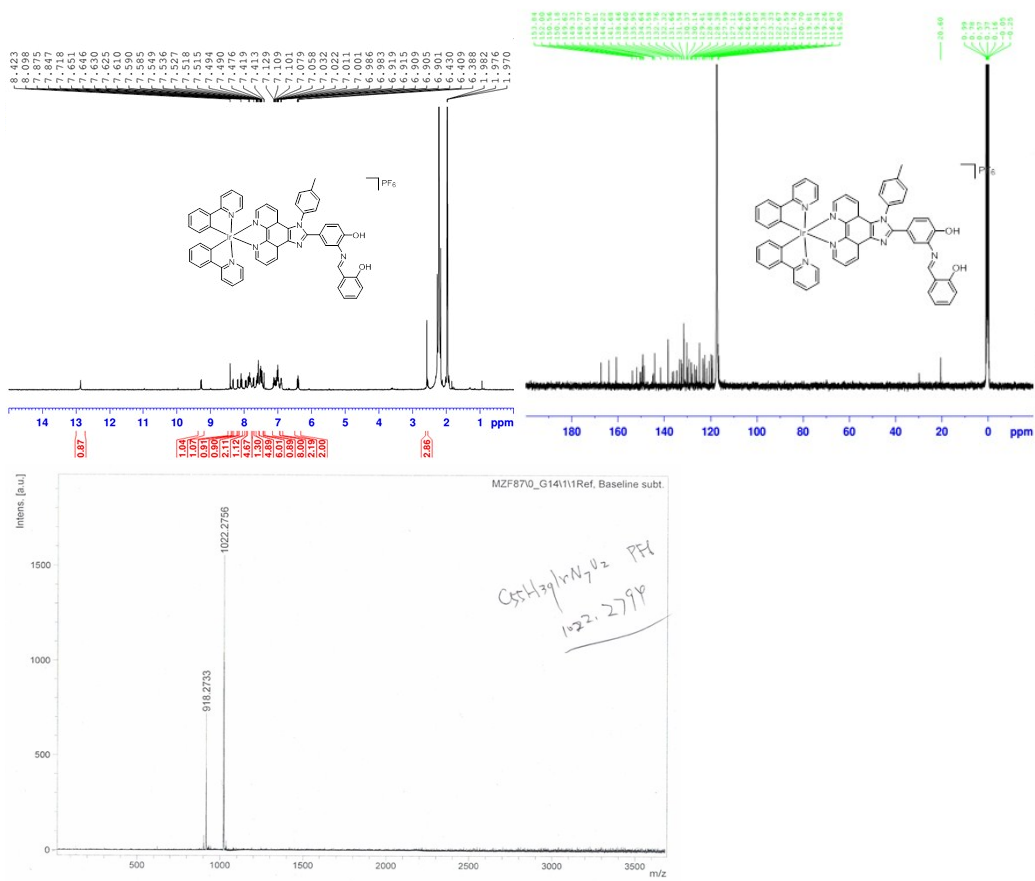

<sup>1</sup>H-NMR, <sup>13</sup>C-NMR and mass spectrum of 1.

**Table S1** Photophysical properties of iridium(III) complex **1**.

| Quantum yield | $\lambda_{em}/\text{nm}$ | Lifetime/ $\mu\text{s}$ | UV/vis absorption<br>$\lambda_{abs}/\text{nm}$ ( $\epsilon/\text{dm}^3\text{mol}^{-1}\text{cm}^{-1}$ ) |
|---------------|--------------------------|-------------------------|--------------------------------------------------------------------------------------------------------|
| 0.0082        | 573                      | 4.201                   | 259 ( $7.06 \times 10^4$ ), 353 ( $2.38 \times 10^4$ )                                                 |

**Table S2** Comparison of the recent chemosensors for the detection of  $\text{Al}^{3+}$  ions.

| Target                                | Detection range            | Detection limit     | Reference  |
|---------------------------------------|----------------------------|---------------------|------------|
| $\text{Al}^{3+}$                      | 1–30 $\mu\text{M}$         | 1 $\mu\text{M}$     | This study |
| $\text{Al}^{3+}$                      | 1–20 $\mu\text{M}$         | 1 $\mu\text{M}$     | 15         |
| $\text{Al}^{3+}$                      | 1–12 $\mu\text{M}$         | 1 $\mu\text{M}$     | 18         |
| $\text{Al}^{3+}$                      | -                          | 2 $\mu\text{M}$     | 16         |
| $\text{Al}^{3+}$                      | 1.25–1000 $\mu\text{M}$    | 1.25 $\mu\text{M}$  | 19         |
| $\text{Al}^{3+}$                      | -                          | 0.887 $\mu\text{M}$ | 24         |
| $\text{Al}^{3+}$                      | 1–8 $\mu\text{M}$          | 0.6 $\mu\text{M}$   | 8          |
| $\text{Al}^{3+}$                      | 0.5–25 $\mu\text{M}$       | -                   | 10         |
| $\text{Al}^{3+}$                      | -                          | 0.5 $\mu\text{M}$   | 9          |
| $\text{Al}^{3+}$                      | -                          | 0.12 $\mu\text{M}$  | 22         |
| $\text{Al}^{3+}$                      | 0.1–1.5 $\mu\text{M}$      | 40 nM               | 17         |
| $\text{Al}^{3+}$                      | 0.1–5 $\mu\text{M}$        | 21.6 nM             | 21         |
| $\text{Al}^{3+}$                      | 0.1–5 $\mu\text{M}$        | 10 nM               | 7          |
| $\text{Al}^{3+}$ and $\text{Zn}^{2+}$ | 20–120 nM                  | 3.1 nM              | 5          |
| $\text{Al}^{3+}$                      | 9.9 nM–0.198 $\mu\text{M}$ | 1.35 nM             | 12         |
| $\text{Al}^{3+}$                      | 40 pM–150 $\mu\text{M}$    | 32.2 pM             | 6          |

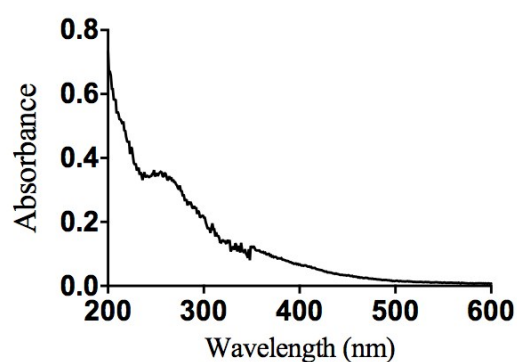**Fig. S1** UV-Vis absorption spectra of **1** (5  $\mu\text{M}$ ) in acetonitrile.

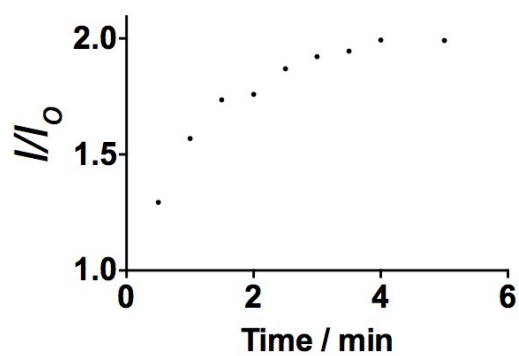

**Fig. S2** Time course of luminescence response of **1** (20  $\mu\text{M}$ ) in the presence of 3  $\mu\text{M}$   $\text{Al}^{3+}$  ions at 25  $^{\circ}\text{C}$ .

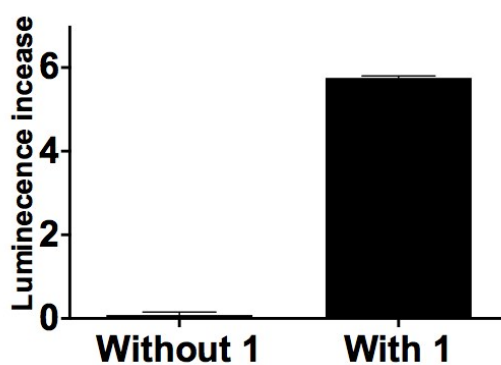

**Fig. S3** Luminescence enhancement of system in response to 20  $\mu\text{M}$   $\text{Al}^{3+}$  in the presence or absence of 20  $\mu\text{M}$  **1**.

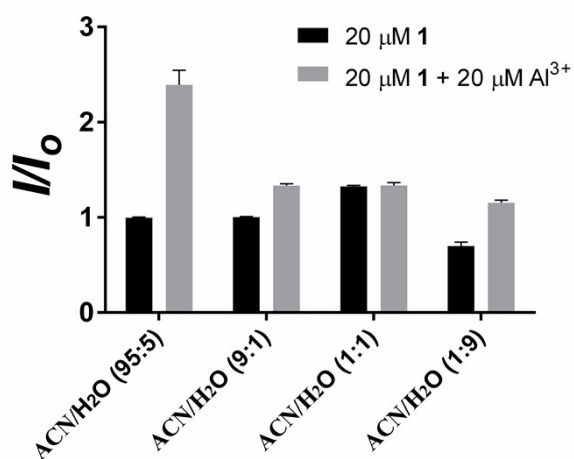

**Fig. S4** Luminescence enhancement of 20  $\mu\text{M}$  **1** with 20  $\mu\text{M}$   $\text{Al}^{3+}$  in various ACN:H<sub>2</sub>O mixtures.



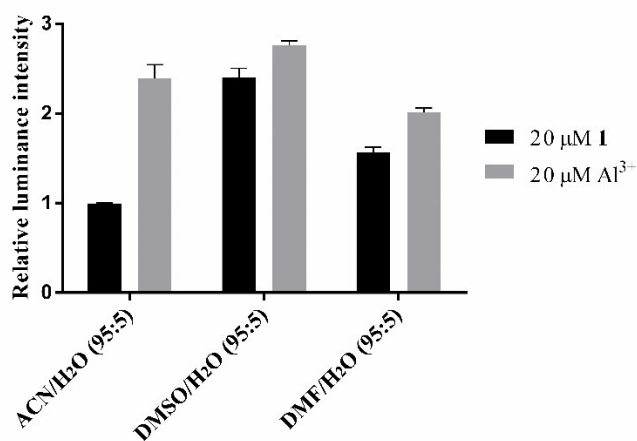

**Fig. S5** Luminescence enhancement of 20 μM **1** with 20 μM Al<sup>3+</sup> in various types of organic solvents with 5% water.

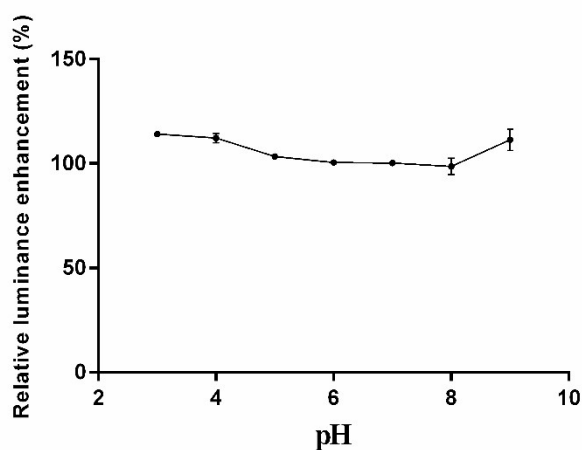

**Fig. S6** Effect of pH on the relative luminescence enhancement of 20 μM **1** towards 20 μM Al<sup>3+</sup>.

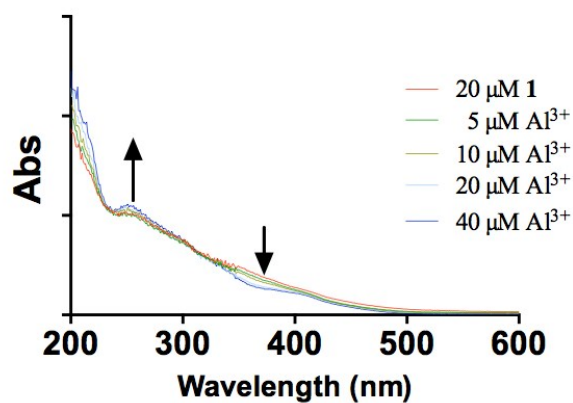

**Fig. S7** UV-Vis absorption spectra of **1** (20 μM) with various amounts of Al<sup>3+</sup> ions (0–40 μM).

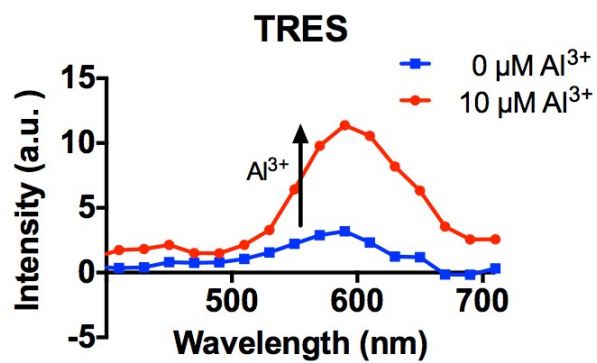

**Fig. S8** time-resolved emission spectra (TRES) of **1** in 2.5% (v/v) serum in the absence and presence of 10  $\mu\text{M Al}^{3+}$  ions.
